# Supplementary material
Source: publisher site journal article supplement (https://www.dovepress.com/article/575767)
Supplement: Supplementary file 1 [file 575767%20Revised%20supplementary.docx]

**Supplementary Materials**

**
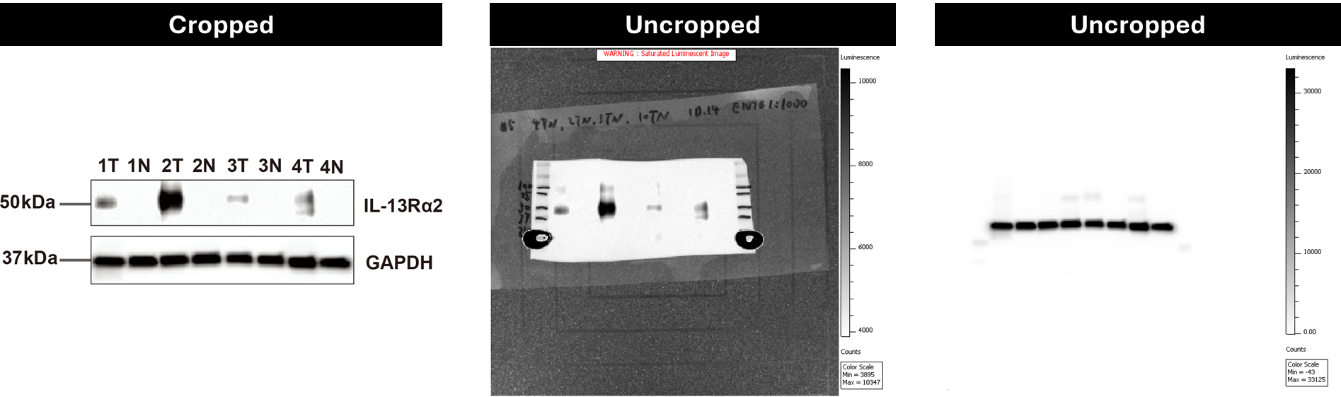
**

**
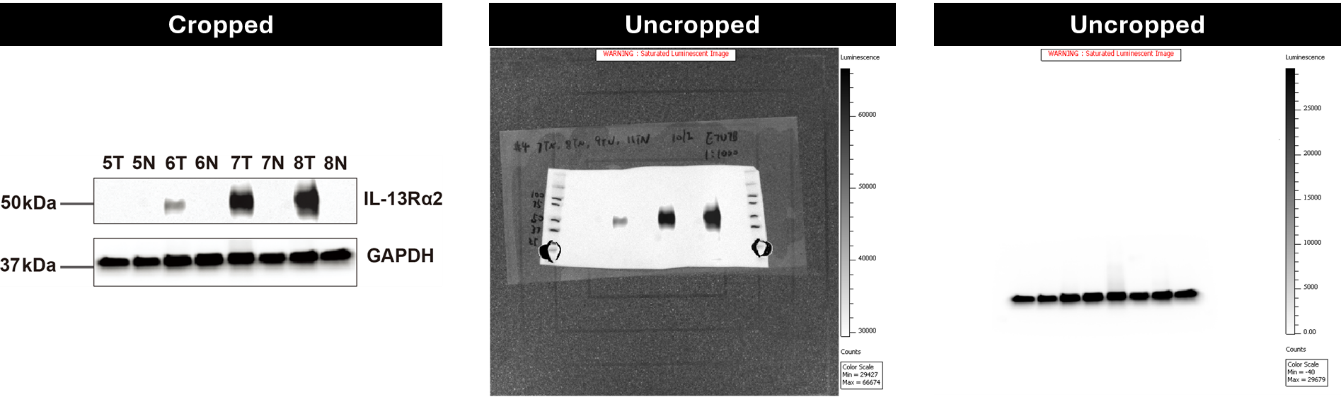
**

**
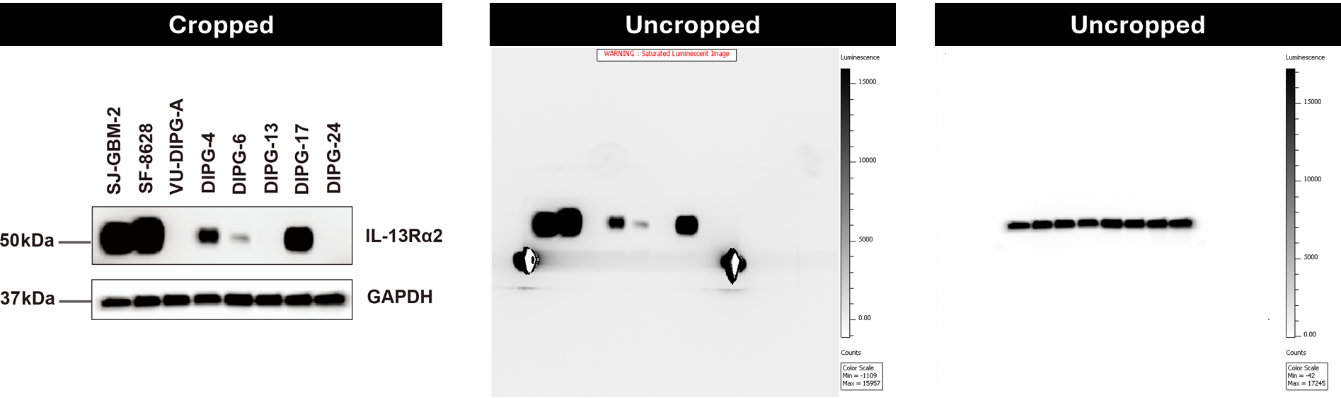
**

**
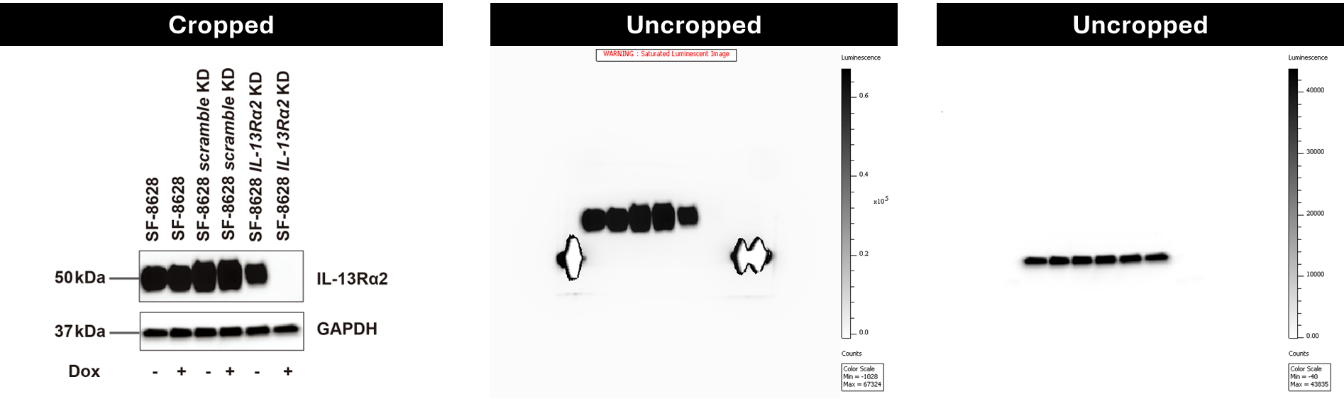
**

**Supplementary Fig. 1** Immunoblots, cropped & uncropped, as related to Figure 1.


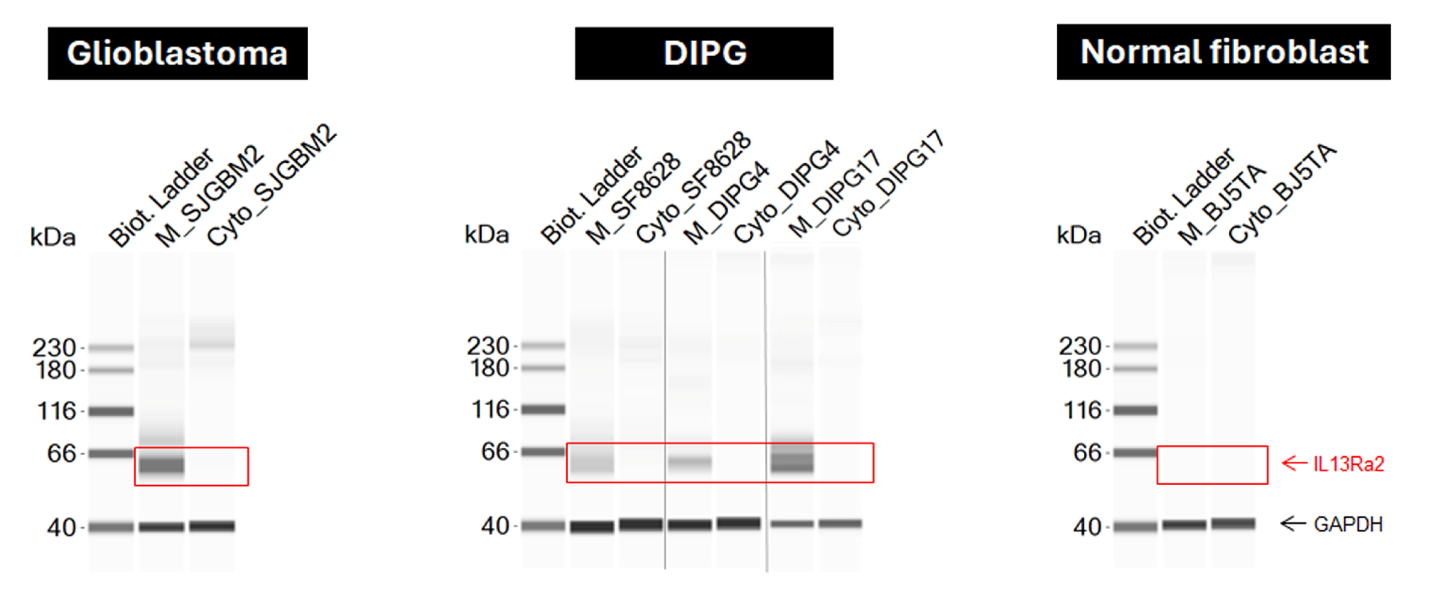
**Supplementary Fig. 2** Differential subcellular localization of IL13αR2 in human glioblastoma, DIPG and normal fibroblast cells assessed by JessTM Simple Western. Membrane (M) and cytoplasmic (Cyto) protein fractions from glioblastoma (SJGBM2), diffuse intrinsic pontine glioma (DIPG; SF8628, DIPG4 and DIPG17) and normal human fibroblast (BJ5TA) cell lines were analyzed for IL13αR2 expression using Jess Western blotting. IL13Rα2 was detected as a band between 61-63 kDa (red boxes). Strong membrane-associated IL13Rα2 expression was found in glioblastoma and DIPG cell lines, with minimal cytoplasmic localization. In contrast, IL13Rα2 expression was undetectable in normal fibroblasts. GAPDH (~40 kDa) serves as a loading control. Molecular weight markers (in kDa) are shown to the left of each blot.


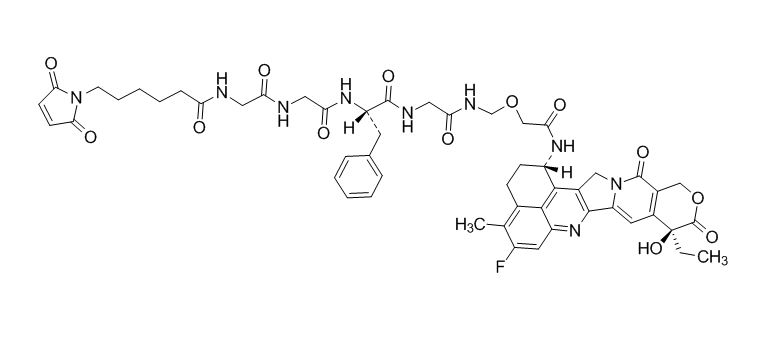


**Supplementary Fig. 3** GGFG-DXd linker Payload


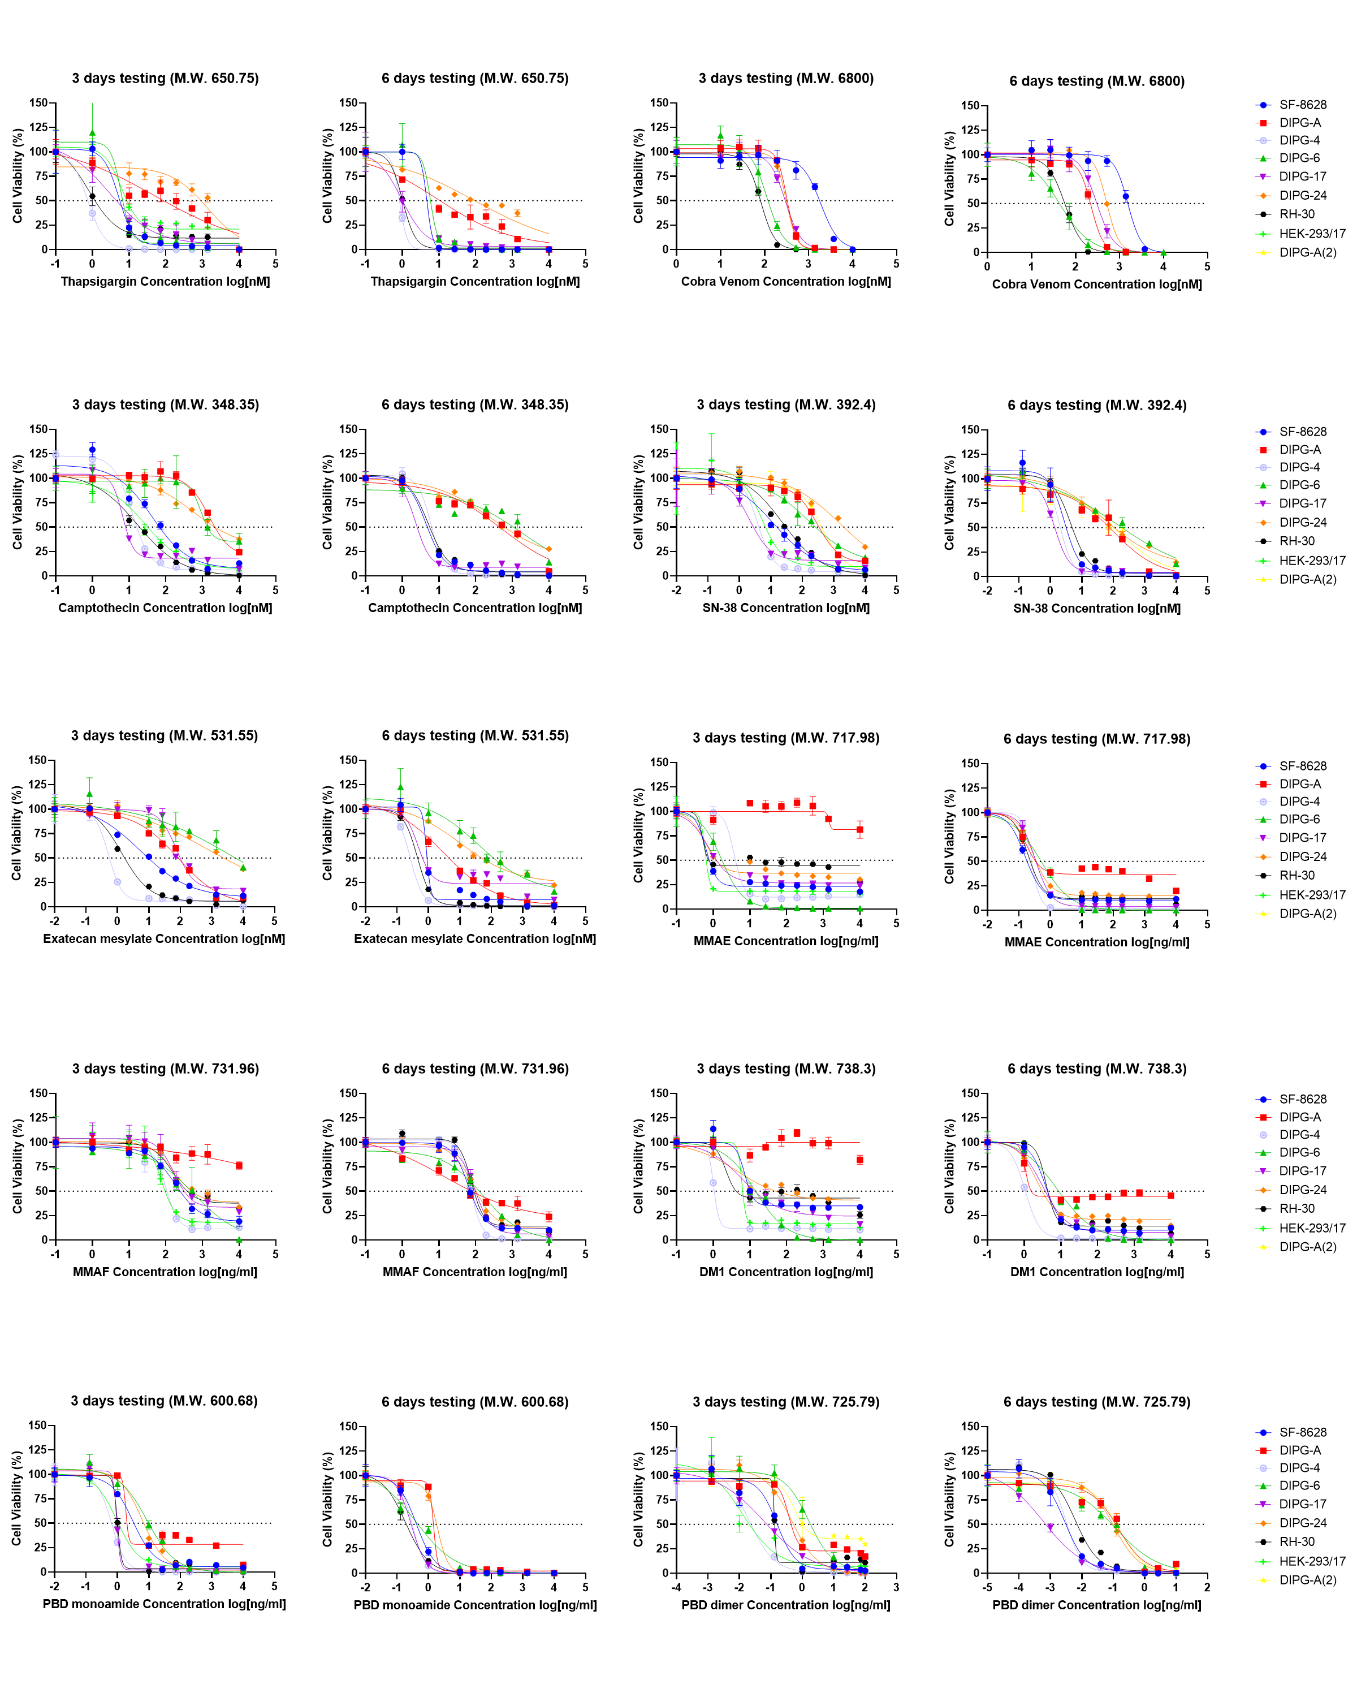


**Supplementary Fig. 4** Cell viability of 10 Drug-linkers or the corresponding basic drug (candidate payload).

**Supplemental Figure 5. Antibody VH and VL sequences**

Millipore Clone 2E10


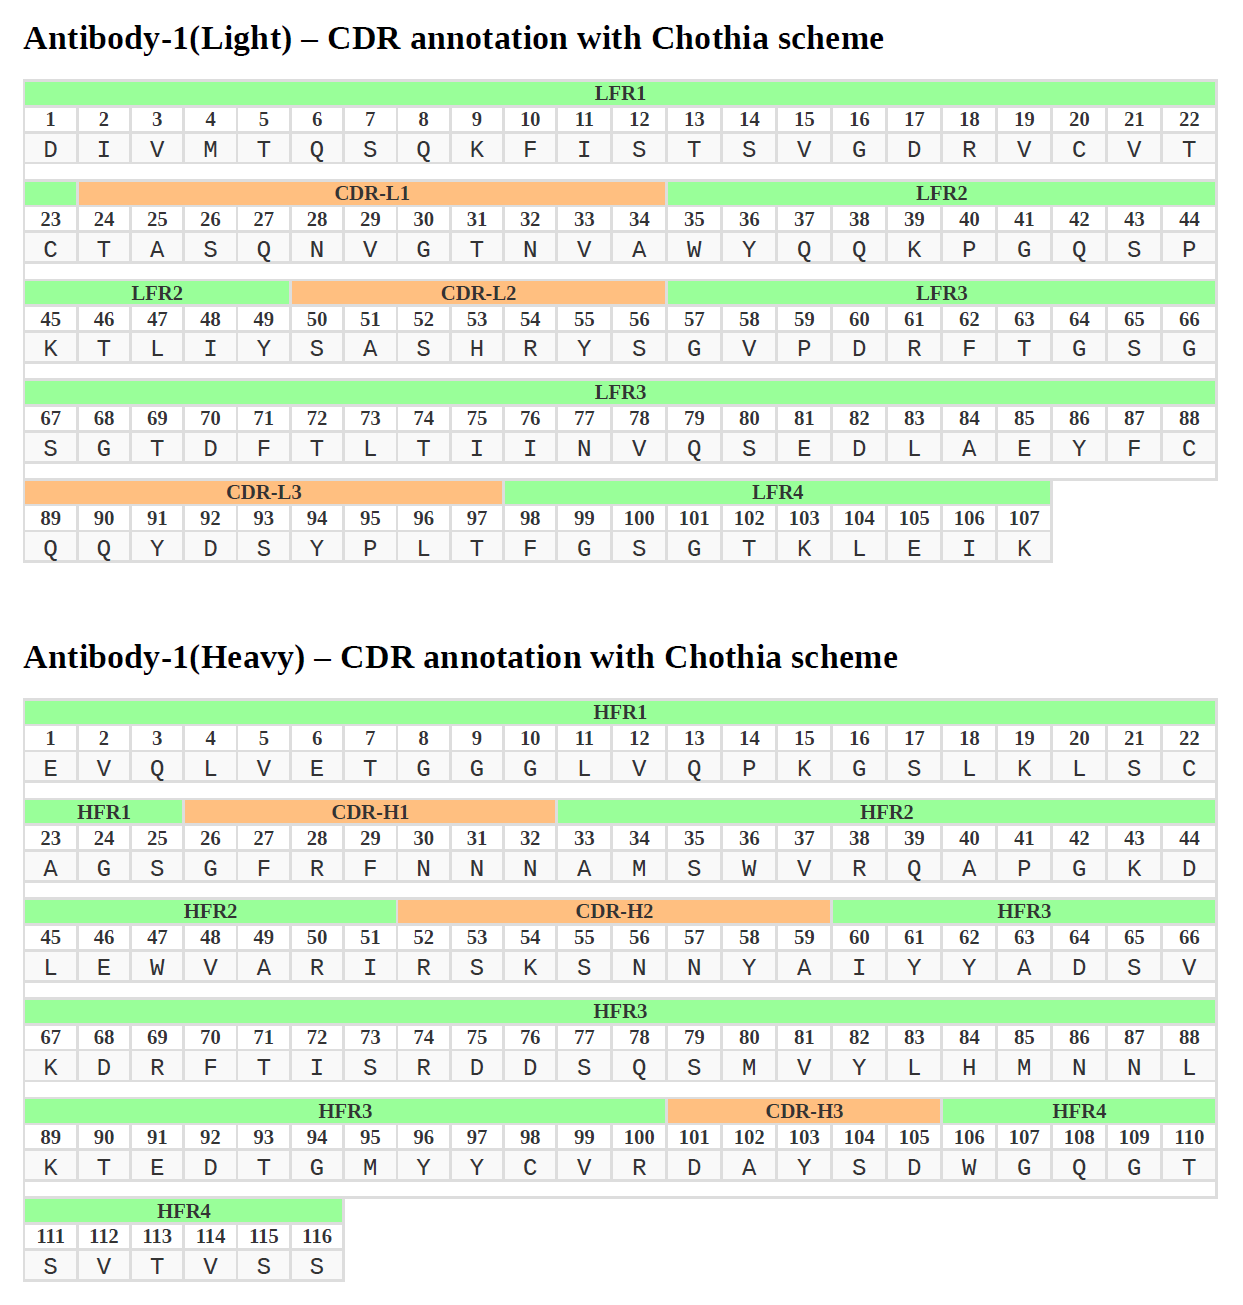


Creative Biolabs Clone 47


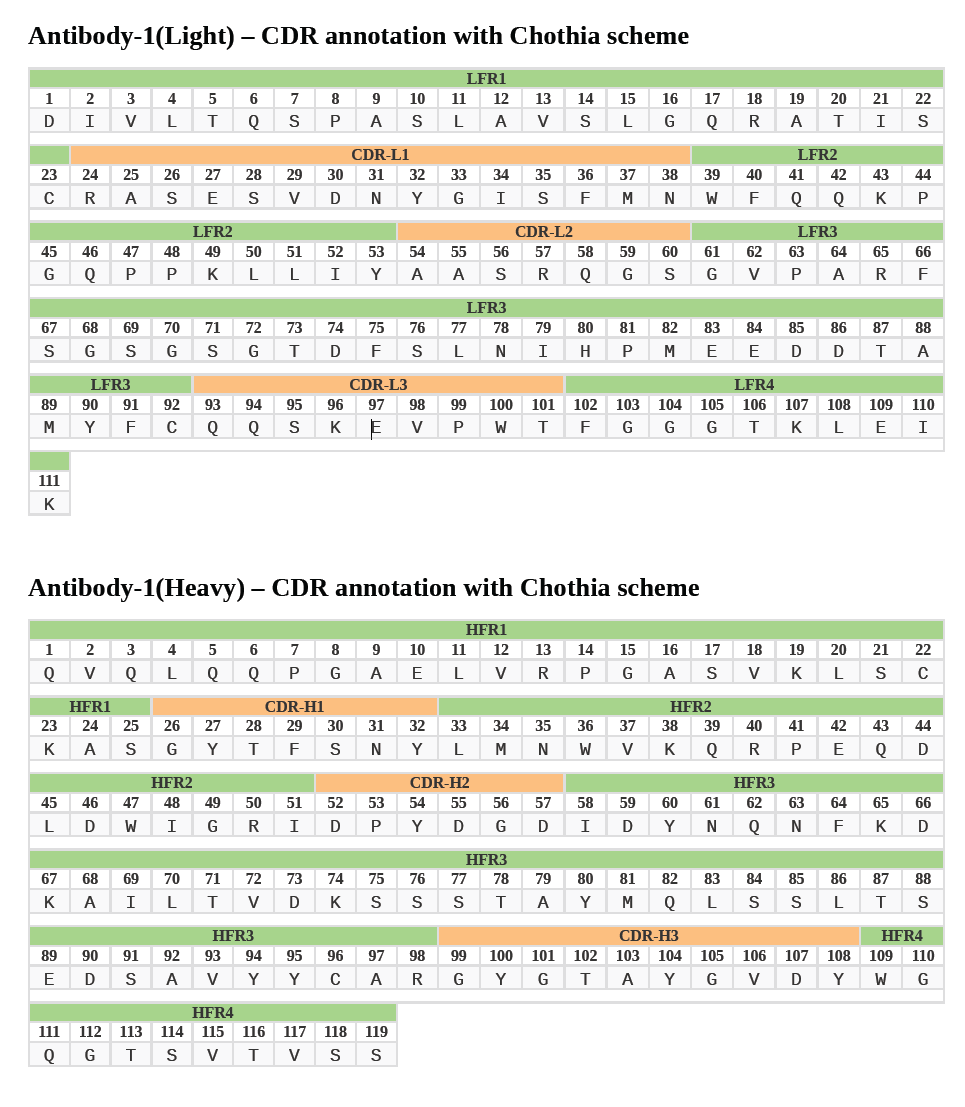


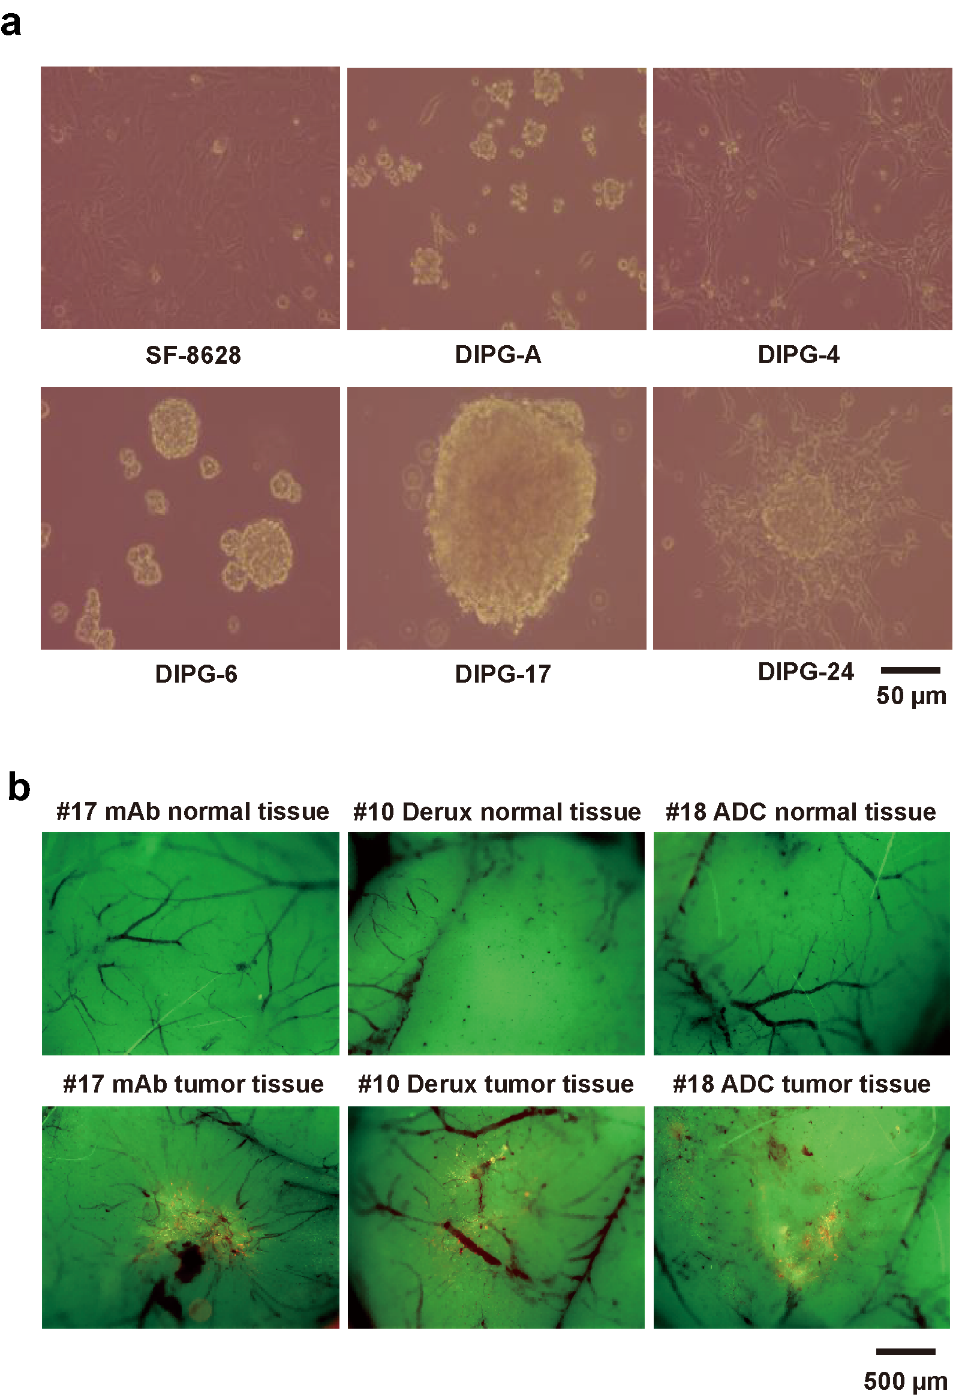


**Supplementary Fig. 6** Morphology of DIPG cell prior to injection and fluorescence microscopy after injection of cell lines. **a** SF-8628 is the DIPG cell line cultured in serum-containing medium, and the remaining cells are DIPG primary cells cultured in serum-free medium. SF-8628, DIPG-4 and DIPG-24 are grown in adherent monolayers. DIPG-A, DIPG-6 and DIPG-17 are grown in suspension. Scale bar, 50 µm. **b** Transplanted tumor cells SF-8628 expressed red fluorescence and brain tissue appeared with green autofluorescence. Observed red fluorescence intensity coincides with the bioluminescence detection results in vivo. Derux represents deruxtecan and the number (e.g. 10, 17, or 18) identifies which mouse from supplemental table 11 was used. Scale bar, 500 µm.

**Supplementary Table 1. FDA approved antibody-drug conjugate therapies**

| Agent | Payload | Target | Year | Indication |
| --- | --- | --- | --- | --- |
| brentuximab vedotin | MMAE/auristatin | CD30 | 2011 | Hodgkin's lymphoma, anaplastic large cell lymphoma |
| ado-trastuzumab emtansine | DM1/maytansinoid | HER2 | 2013 | breast cancer |
| inotuzumab ozogamicin | ozogamicin/calicheamicin | CD22 | 2017 | B-cell precursor acute lymphoblastic leukemia |
| gemtuzumab ozogamicin | ozogamicin/calicheamicin | CD33 | 2017 | acute myelogenous leukemia |
| moxetumomab pasudotox | PE38/pseudotox | CD22 | 2018 | hairy cell leukemia |
| polatuzumab vedotin-piiq | MMAE/auristatin | CD79 | 2019 | diffuse large B-cell lymphoma |
| enfortumab vedotin | MMAE/auristatin | NECTIN4 | 2019 | urothelial cancer |
| trastuzumab deruxtecan | Deruxtecan/camptothecin | HER2 | 2019 | breast cancer |
| sacituzumab govitecan | SN-38/camptothecin | TROP2 | 2020 | triple-negative breast cancer |
| belantamab mafodotin-blmf | MMAF/auristatin | BCMA | 2020/failed | multiple myeloma |
| loncastuximab tesirine-lpyl | SG3199/PBD dimer | CD19 | 2021 | large B-cell lymphoma |
| tisotumab vedotin-tftv | MMAE/auristatin | CD142 | 2021 | cervical cancer |
| mirvetuximab soravtansine | DM4/maytansinoid | FOLR1 | 2022 | ovarian cancer |

**Supplementary Table 2. DIPG autopsy sample demographics**

| **Figure 1 alias** | **Sample ID** | **Tumor/Normal** | **Cancer type** | **Age** | **Sex** | **Primary Site** | **Treatment** | **Tissue** | **Location** |
| --- | --- | --- | --- | --- | --- | --- | --- | --- | --- |
| 1T | CF-00485-1 | tumor | midline glioma | 10 | male | - | - | tumor | - |
| 1N | CF-00485-2 | normal |  | 10 | male | - | - | normal | - |
| 2T | CF-00015tu | tumor | DIPG | - | - | - | - | tumor | pons and midbrain |
| 2N | CF-00015no | normal |  | - | - | - | - | normal | - |
| 3T | CF-00484-1 | tumor | DIPG | 6 | female | - | - | tumor | central tumor, right pons |
| 3N | CF-00484-5 | normal |  | 6 | female | - |  | normal | white matter, frontal lobe |
| 4T | CF-01380-2 | tumor | DIPG | 6 | female | right pons | - | tumor- | right pons |
| 4N | CF-01380-3 | normal |  | 6 | female | - | - | normal | brain (normal) |
| 5T | CF-01299-1 | tumor | DIPG | 3 | male | pontine | - | tumor | pons |
| 5N | CF-01299-2 | normal |  | 3 | male | - | - | normal | brain (normal) |
| 6T | CF-01300-1 | tumor | DIPG | 39 | male | pontine | XRT | tumor- | pontine |
| 6N | CF-01300-2 | normal |  | 39 | male | - | XRT | normal | right frontal lobe (normal) |
| 7T | CF-01304-1 | tumor | brain stem glioma | 51 | female | left pons | - | tumor- | left pons |
| 7N | CF-01304-2 | normal |  | 51 | female | - |  | normal | right frontal lobe (normal) |
| 8T | CF-01456-1 | tumor | diffuse midline glioma | - | - | - | - | tumor | right cerebellum |
| 8N | CF-01456-2 | normal |  | - | - | - | - | normal | left temporal lobe |

XRT: radiotherapy

**Supplementary Table 3. DIPG and Glioblastoma (GBM) cell models demographics**

| **Cell line** | **Age (years)** | **Sex** | **Histology** | **H3 status** | **WHO Grade** | **Origin** | **Treatment** | **OS (months)** | **Tissue Source** |
| --- | --- | --- | --- | --- | --- | --- | --- | --- | --- |
| SU-DIPG-IV  (DIPG-4) | 2 | F | glioblastoma | H3.1K27M | III | pons | XRT + cetuximab/ irinotecan | 8 | autopsy |
| SU-DIPG-VI  (DIPG-6) | 7 | F | high-grade glioma | H3.3K27M | III | pons | XRT + vorinostat | 6 | autopsy |
| SU-DIPG-XIII  (DIPG-13) | 6 | F | glioblastoma | H3.3K27M | IV | pons | XRT | 4 | autopsy |
| SU-DIPG-XVII  (DIPG-17) | 8 | M | glioblastoma | H3.3K27M | IV | pons | XRT + bevacizumab -> panobinostat -> re- XRT -> everolimus | 13 | autopsy |
| SU-DIPG-XXIV  (DIPG-24) | 6 | F | DIPG | H3.3K27M | IV | pons | XRT; bevacizumab | 8 | autopsy |
| SF-8628 | 3 | F | DIPG | H3.3K27M | IV | pons | - | - | biopsy |
| VU-DIPG-A | 3 | F | diffuse astrocytoma | H3.3K27M | III | pons | XRT (54 Gy) | 8 | biopsy |
| SJ-GBM2 | 5 | F | glioblastoma | - | - | frontal lobe | post XRT (10 Gy) | - | biopsy |
| CHLA200 | 12 | M | glioblastoma | - | IV | parietal lobe | chemotherapy + XRT | - | autopsy |

XRT: radiotherapy, WHO: World Health Organization, DIPG: diffuse intrinsic pontine glioma,

H3.3K27M: Lysine-27-Methionine mutation in H3-3A histone 3 gene

**Supplementary Table 4. Short tandem repeats of cell lines**

| Cell Line | AMEL | CSF1PO | D13S317 | D16S539 | S21S11 | D5S818 | D7S820 | TH01 | TPOX | vWA | D18S51 | Penta D | Penta E |
| --- | --- | --- | --- | --- | --- | --- | --- | --- | --- | --- | --- | --- | --- |
| SU-DIPG-IV | X/X | 9/10 | 7/12 | 9/12 | 29/31 | 12/13 | 10/11 | 6/9.3 | 8/8 | 15/19 | 14/14 | 7/12 | 9/13 |
| SU-DIPG-VI | X/X | 10/11 | 11/11 | 13/13 | 29/30/31 | 10/12 | 8/9 | 7/8 | 8/11 | 18/18 | 19/19 | 11/12 | 12/14 |
| SU-DIPG-XIII | - | - | - | - | - | - | - | - | - | - | - | - | - |
| SU-DIPG-XVII | X/Y | 13/13 | 9/9 | 9/12 | 28/29 | 11/11 | 8/9 | 7/7 | 8/11 | 18/19 | 16/16 | 7/11 | 12/13 |
| SU-DIPG-XXVI | X/X | 10/10 | 11/11 | 11/13 | 30/30 | 11/11 | 8/10 | 6/9.3 | 8/11 | 17/19 | 14/17 | 12/13 | 4/19 |
| SF-8628 | X/Y | 11/12 | 9/9 | 9/9 | 29/30 | 11/12 | 11/11 | 7/7 | 8/8 | 16/17 | 14/14 | 11/13 | 11/12 |
| VU-DIPG-A | X/X | 12/12 | 11/11 | 16/17 | 29/29 | 11/12 | 11/11 | 6/8 | 11/11 | 16/17 | 12/13 | 5/15 | 15/15 |
| SJ-GBM2 | - | - | - | - | - | - | - | - | - | - | - | - | - |
| CHLA-200 | - | - | - | - | - | - | - | - | - | - | - | - | - |
| RH-30 | X/Y | 10/11 | 11/11 | 12/12 | 29/31.2 | 12/13 | 10/10 | 9/9.3 | 8/11 | 17/18 | 15/16 | 7/17 | 11/12 |

**Supplemental Table 5.** IC50 at Day 6 for Unconjugated Candidate Payloads (primary data is given in Supplementary Figure 4)

| 144 hr IC50  (nM) | thapsigargin | cobra venom  (cardiotoxin-III) | camptothecin  (deruxtecan surrogate) | SN-38  (deruxtecan  surrogate) | exatecan  mesylate | MMAE  (monomethyl  auristatin E) | MMAF  (monomethyl  auristatin F) | DM1  (mertansine) | PBD  (pyrrolobenzo-diazepine)  monoamide | PBD  dimer |
| --- | --- | --- | --- | --- | --- | --- | --- | --- | --- | --- |
| CAS | 67526-95-8 | 11061-96-4 | 7689-03-4 | 86639-52-3 | 169869-90-3 | 474645-27-7 | 745017-94-1 | 139504-50-0 | 2093165-00-3 | 1222490-34-7 |
| Target | SERCA | Ca2+/Mg2+-ATPase | TOPO-I | TOPO-I | TOPO-I | tubulin | tubulin | tubulin | DNA binding | DNA binding |
| SF-8628 | 5 | 1520 | 5 | 3 | 0.9 | 0.3 | 98 | 5 | 0.7 | 0.004 |
| DIPG-A | 8 | 218 | 602 | 73 | 4 | 3 | 105 | 3 | 2.3 | 0.168 |
| SU-DIPG-IV  (DIPG-4) | 0.8 | × | 6 | 5 | 0.6 | 0.4 | 102 | 1 | 0.5 | 0.004 |
| SU-DIPG-VI  (DIPG-6) | 6 | 42 | 1254 | 246 | 117 | 0.7 | 157 | 12 | 0.8 | 0.105 |
| SU-DIPG-XVII  (DIPG-17) | 1 | 302 | 3 | 1 | 0.6 | 0.4 | 135 | 5 | 0.5 | 0.001 |
| SU-DIPG-XXIV  (DIPG-24) | 116 | 511 | 605 | 108 | 50 | 0.6 | 141 | 4 | 3 | 0.125 |
| RH30 | 1 | 56 | 6 | 5 | 0.6 | 0.3 | 124 | 5 | 0.3 | 0.01 |

**Supplemental Table 6.** IC50 at Day 3 for Unconjugated Candidate Payloads (primary data is given in Supplementary Figure 4)

| 72 hr IC50  (nM) | thapsigargin | cobra venom  (cardiotoxin-III) | camptothecin  (deruxtecan surrogate) | SN-38  (deruxtecan  surrogate) | exatecan  mesylate | MMAE  (monomethyl  auristatin E) | MMAF  (monomethyl  auristatin F) | DM1  (mertansine) | PBD  (pyrrolobenzo-diazepine)  monoamide | PBD  dimer |
| --- | --- | --- | --- | --- | --- | --- | --- | --- | --- | --- |
| CAS | 67526-95-8 | 11061-96-4 | 7689-03-4 | 86639-52-3 | 169869-90-3 | 474645-27-7 | 745017-94-1 | 139504-50-0 | 2093165-00-3 | 1222490-34-7 |
| Target | SERCA | Ca2+/Mg2+-ATPase | TOPO-I | TOPO-I | TOPO-I | tubulin | tubulin | tubulin | DNA binding | DNA binding |
| SF-8628 | 6 | 1710 | 68 | 16 | 10 | 1 | 337 | 14 | 5 | 0.22 |
| DIPG-A | 122 | 328 | 2177 | 341 | 85 | >13928 | >13662 | >13545 | 3 | 0.55 |
| SU-DIPG-IV  (DIPG-4) | 0.8 | × | 16 | 4 | 0.6 | 6 | 148 | 1 | 1 | 0.03 |
| SU-DIPG-VI  (DIPG-6) | 7 | 120 | 1369 | 261 | 5295 | 3 | 557 | 19 | 17 | 2.51 |
| SU-DIPG-XVII  (DIPG-17) | 5 | 295 | 8 | 3 | 99 | 1 | 433 | 20 | 2 | 0.11 |
| SU-DIPG-XXIV  (DIPG-24) | 1029 | 310 | 2186 | 2099 | 2396 | 4 | 687 | 112 | 12 | 0.73 |
| RH30 | 1 | 81 | 19 | 31 | 2 | 1 | 526 | 5 | 2 | 0.18 |

**Supplemental Table 7. IL13Rα2** ectodomain (amino acids 29-331 of <https://www.ncbi.nlm.nih.gov/protein/NP_000631.1?report=fasta>)

**(KEY RESIDUES ARE HIGHLIGHTED)**

| Clone | Amino Acids 29-331 |
| --- | --- |
| Clone 2E10 | DTEIKVNPPQDFEIVDPGYLGYLYLQWQPPLSLDHFKECTVEYELKYRNIGSETWKTIITKNLHYKDGFDLNKGIEAKIHTLLPWQCTNGSEVQSSWAETTYWISPQGIPETKVQDMDCVYYNWQYLLCSWKPGIGVLLDTNYNLFYWYEGLDHALQCVDYIKADGQNIGCRFPYLEASDYKDFYICVNGSSENKPIRSSYFTFQLQNIVKPLPPVYLTFTRESSCEIKLKWSIPLGPIPARCFDYEIEIREDDTTLVTATVENETYTLKTTNETRQLCFVVRSKVNIYCSDDGIWSEWSDKQCWEGEDLSKKTLLR |
| Clone 47 | DTEIKVNPPQDFEIVDPGYLGYLYLQWQPPLSLDHFKECTVEYELKYRNIGSETWKTIITKNLHYKDGFDLNKGIEAKIHTLLPWQCTNGSEVQSSWAETTYWISPQGIPETKVQDMDCVYYNWQYLLCSWKPGIGVLLDTNYNLFYWYEGLDHALQCVDYIKADGQNIGCRFPYLEASDYKDFYICVNGSSENKPIRSSYFTFQLQNIVKPLPPVYLTFTRESSCEIKLKWSIPLGPIPARCFDYEIEIREDDTTLVTATVENETYTLKTTNETRQLCFVVRSKVNIYCSDDGIWSEWSDKQCWEGEDLSKKTLLR |

**Supplemental Table 8. COMPARISON OF VH SEQUENCES (KEY RESIDUES ARE HIGHLIGHTED)**

| Sample | VH Sequence |
| --- | --- |
| Clone 2E10  Clone 47 | 1 EVQLVETGGGLVQPKGSLKLSCAGSGFRFNNNAMSWVRQAPGKDLEWVARIRSKSNNYAI 60  +VQL + G  LV+P  S+KLSC  SG+ F+N  M+WV+Q P +DL+W+ RI     +  I  1 --QVQLQQPGAELVRPGASVKLSCKASGYTFSNYLMNWVKQRPEQDLDWIGRIDPYDGDI 58 |
| Clone 2E10  Clone 47 | 61 YYADSVKDRFTISRDDSQSMVYLHMNNLKTEDTGMYYCVRD---AYS—DWGQGTSVTVS 115  Y  + KD+  ++ D S S  Y+ +++L +ED+ +YYC R    AY    WGQGTSVTVS  59 DYNQNFKDKAILTVDKSSSTAYMQLSSLTSEDSAVYYCARGYGTAYGVDYWGQGTSVTVS  118 |
| Clone 2E10  Clone 47 | 116 SAKTTAPSVYPLAPVCGDTSGSSVTLGCLVKGYFPEPVTLTWNSGSLSSGVHTFPAVLQS 175  SAKTT PSVYPLAP + S VTLGCLVKGYFPEPVT+TWNSGSLSSGVHTFPAVLQS  119 SAKTTPPSVYPLAPGSAAQTNSMVTLGCLVKGYFPEPVTVTWNSGSLSSGVHTFPAVLQS 178 |
| Clone 2E10  Clone 47 | 176 DLYTLSSSVTVTSSTWPSQSITCNVAHPASSTKVDKKIEPRGPTIKPCPPCKCPAPNLLG 235  DLYTLSSSVTV SSTWPS+++TCNVAHPASSTKVDKKI PR C PC C P +  179 DLYTLSSSVTVPSSTWPSETVTCNVAHPASSTKVDKKIVPRDCG---CKPCICTVPEV-- 233 |
| Clone 2E10  Clone 47 | 236 GPSVFIFPPKIKDVLMISLSPIVTCVVVDVSEDDPDVQISWFVNNVEVHTAQTQTHREDY 295  SVFIFPPK KDVL I+L+P VTCVVVD+S+DDP+VQ SWFV++VEVHTAQTQ E +  234 -SSVFIFPPKPKDVLTITLTPKVTCVVVDISKDDPEVQFSWFVDDVEVHTAQTQPREEQF 292 |
| Clone 2E10  Clone 47 | 296 NSTLRVVSALPIQHQDWMSGKEFKCKVNNKDLPAPIERTISKPKGSVRAPQVYVLPPPEE 355  NST R VS LPI HQDW++GKEFKC+VN+ PAPIE+TISK KG +APQVY +PPP+E  293 NSTFRSVSELPIMHQDWLNGKEFKCRVNSAAFPAPIEKTISKTKGRPKAPQVYTIPPPKE 352 |
| Clone 2E10  Clone 47 | 356 EMTKKQVTLTCMVTDFMPEDIYVEWTNNGKTELNYKNTEPVLDSDGSYFMYSKLRVEKKN 415  +M K +V+LTCM+TDF PEDI VEW NG+ NYKNT+P++D+DGSYF+YSKL V+K N  353 QMAKDKVSLTCMITDFFPEDITVEWQWNGQPAENYKNTQPIMDTDGSYFVYSKLNVQKSN 412 |
| Clone 2E10  Clone 47 | 416 WVERNSYSCSVVHEGLHNHHTTKSFSRTPG 445  W N+++CSV+HEGLHNHHT KS S +PG  413 WEAGNTFTCSVLHEGLHNHHTEKSLSHSPG 442 |

**Supplemental Table 9. COMPARISON OF VL SEQUENCES (KEY RESIDUES ARE HIGHLIGHTED)**

| Sample | VH Sequence |
| --- | --- |
| Clone 2E10 1  Clone 47 1 | 1 DIVMTQSQKFISTSVGDRVCVTCTASQNVG----TNVAWYQQKPGQSPKTLIYSASHRYS 56  DIV+TQS ++ S+G R ++C AS++V + + W+QQKPGQ PK LIY+AS + S  1 DIVLTQSPASLAVSLGQRATISCRASESVDNYGISFMNWFQQKPGQPPKLLIYAASRQGS 60 |
| Clone 2E10 57  Clone 47 61 | 57 GVPDRFTGSGSGTDFTLTIINVQSEDLAEYFCQQYDSYPLTFGSGTKLEIKRADAAPTVS 116  GVP RF+GSGSGTDF+L I ++ +D A YFCQQ P TFG GTKLEIKRADAAPTVS  61 GVPARFSGSGSGTDFSLNIHPMEEDDTAMYFCQQSKEVPWTFGGGTKLEIKRADAAPTVS 120 |
| Clone 2E10 117  Clone 47 121 | 117 IFPPSSEQLTSGGASVVCFLNNFYPKDINVKWKIDGSERQNGVLNSWTDQDSKDSTYSMS 176  IFPPSSEQLTSGGASVVCFLNNFYPKDINVKWKIDGSERQNGVLNSWTDQDSKDSTYSMS  121 IFPPSSEQLTSGGASVVCFLNNFYPKDINVKWKIDGSERQNGVLNSWTDQDSKDSTYSMS 180 |
| Clone 2E10 177  Clone 47 181 | 177 STLTLTKDEYERHNSYTCEATHKTSTSPIVKSFNRNEC 214  STLTLTKDEYERHNSYTCEATHKTSTSPIVKSFNRNEC  181 STLTLTKDEYERHNSYTCEATHKTSTSPIVKSFNRNEC 218 |

**Supplemental Table 10.** Percentage body weight change for mAb, deruxtecan, and ADC treated mice

| mice weight change (%) | Day-7 | Day-1 | Day0 | Day2 | Day4 | Day6 | Day8 | Day10 | Day12 | Day15 | Day17 | Day19 | Day21 | Day23 | Day29 | Day30 | Day32 | Day35 |
| --- | --- | --- | --- | --- | --- | --- | --- | --- | --- | --- | --- | --- | --- | --- | --- | --- | --- | --- |
| #9 mAb | -7.22 | -3.33 | 0.00 | 1.67 | 2.22 | 0.00 | 3.33 | 1.11 | 2.78 | 5.00 | 8.33 | 7.22 | 11.11 | 11.11 | 17.22 | 20.00 | 24.44 | 30.56 |
| #12 mAb | -6.31 | -1.35 | 0.00 | 3.15 | 4.05 | -2.70 | 4.05 | 4.50 | 4.50 | 7.66 | 10.81 | 9.91 | 14.41 | 13.51 | 18.92 | 16.67 | 18.47 | 20.72 |
| #13 mAb | -0.45 | 1.36 | 0.00 | 3.18 | 5.00 | 3.64 | 5.00 | 5.45 | 5.45 | 6.36 | 8.64 | 6.36 | 8.18 | 9.55 | 13.64 | 12.73 | 15.45 | 15.45 |
| #6 mAb | -6.22 | 0.00 | 0.00 | 9.33 | 8.81 | 7.77 | 11.92 | 6.74 | 11.92 | 11.92 | 10.88 | 15.03 | 15.54 | 19.69 | 34.20 | 32.64 | 31.09 | 33.68 |
| #7 mAb | -3.03 | 2.02 | 0.00 | 4.04 | 6.57 | 5.05 | 7.07 | 4.55 | 10.10 | 9.09 | 12.63 | 14.65 | 14.65 | 16.67 | 17.68 | 19.70 | 18.69 | 19.19 |
| #17 mAb | -2.91 | 1.74 | 0.00 | 1.74 | 7.56 | 3.49 | 2.33 | 2.91 | 4.65 | 4.65 | 6.40 | 5.23 | 12.21 | 9.88 | 9.30 | 9.30 | 13.95 | 16.28 |
|  |  |  |  |  |  |  |  |  |  |  |  |  |  |  |  |  |  |  |
| #3 deruxtecan | 2.07 | 4.15 | 0.00 | 5.18 | 2.59 | 7.25 | 10.88 | 14.51 | 17.10 | 23.32 | 21.76 | 16.06 | 21.76 | 21.24 | 18.13 | 22.80 | 26.42 | 34.20 |
| #4 deruxtecan | 2.08 | 3.13 | 0.00 | 9.90 | 12.50 | 12.50 | 9.38 | 8.85 | 10.42 | 9.90 | 11.98 | 10.94 | 15.63 | 10.94 | 14.58 | 15.10 | 18.75 | 27.60 |
| #11 deruxtecan | 1.75 | 6.14 | 0.00 | 8.33 | 11.84 | 5.70 | 4.39 | 1.75 | 1.75 | 7.89 | 4.39 | 2.63 | 4.82 | 3.07 | -6.58 | -10.53 | -3.51 | 7.46 |
| #15 deruxtecan | 1.01 | 6.06 | 0.00 | 4.55 | 10.61 | 8.08 | 7.58 | 8.59 | 12.12 | 14.14 | 16.16 | 14.65 | 17.68 | 20.71 | 22.73 | 21.21 | 23.74 | 23.74 |
| #10 deruxtecan | -2.76 | 2.21 | 0.00 | 1.10 | 6.63 | 3.87 | 4.42 | 2.76 | 9.39 | 10.50 | 12.15 | 8.84 | 13.81 | 12.71 | 13.26 | 11.60 | 13.81 | 14.36 |
| #16 deruxtecan | 7.77 | 5.18 | 0.00 | 9.33 | 17.10 | 14.51 | 14.51 | 10.36 | 13.47 | 15.54 | 17.10 | 14.51 | 19.17 | 19.17 | 18.65 | 19.17 | 23.32 | 23.83 |
|  |  |  |  |  |  |  |  |  |  |  |  |  |  |  |  |  |  |  |
| #1 ADC | -1.52 | -0.51 | 0.00 | 8.12 | 7.61 | 7.11 | 9.64 | 8.12 | 11.17 | 9.14 | 12.69 | 9.14 | 13.20 | 13.20 | 20.30 | 18.78 | 18.78 | 21.83 |
| #2 ADC | -1.10 | 3.87 | 0.00 | 0.00 | 12.15 | 8.84 | 13.26 | 12.15 | 13.81 | 18.23 | 14.92 | 20.99 | 24.31 | 23.20 | 31.49 | 34.25 | 28.73 | 32.04 |
| #5 ADC | -1.93 | 2.90 | 0.00 | 4.35 | 5.80 | 7.73 | 10.14 | 8.21 | 12.08 | 9.66 | 11.11 | 13.53 | 14.01 | 17.87 | 25.12 | 28.02 | 29.95 | 30.43 |
| #8 ADC | 3.30 | 7.69 | 0.00 | 6.04 | 13.19 | 11.54 | 15.93 | 11.54 | 18.13 | 17.03 | 18.13 | 20.33 | 21.98 | 20.88 | 26.37 | 29.67 | 29.12 | 28.02 |
| #14 ADC | -5.32 | 0.53 | 0.00 | 3.19 | 5.32 | 2.66 | 5.32 | 4.79 | 5.32 | 3.72 | 5.32 | 7.98 | 8.51 | 9.04 | 9.04 | 9.57 | 10.11 | 13.30 |
| #18 ADC | 2.94 | 2.45 | 0.00 | 9.31 | 10.29 | 7.35 | 5.39 | 5.88 | 4.41 | 5.39 | 4.41 | 5.88 | 5.88 | 3.92 | 9.31 | 10.29 | 12.75 | 14.71 |

*n.b.* These juvenile, growing mice gained weight (instead of losing weight, as might be seen with drug toxicity).

**Supplementary Table 11. Summary of IL13Rα2 expression, payload sensitivity and ADC activity**

| 72 hr IC50  (nM) | IL13Rα2 expression  (Figures 1c and 2d) | camptothecin  (deruxtecan surrogate) | SN-38  (deruxtecan  surrogate) | exatecan  mesylate | anti-IL13Rα2 ADC  (6 day IC50, nM)  (Figure 5a) | ex ovo sensitivity  to DXd/ADC |
| --- | --- | --- | --- | --- | --- | --- |
| SF-8628 | ++++ | 68 | 16 | 10 | 337 | Yes/Yes |
| DIPG-A | - | 2177 | 341 | 85 | >1000 |  |
| DIPG-4 | ++ | 16 | 4 | 0.6 | 74 | Yes/Yes |
| DIPG-6 | + | 1369 | 261 | 5295 | >1000 |  |
| DIPG-17 | +++ | 8 | 3 | 99 | 175 |  |
| DIPG-24 | trace | 2186 | 2099 | 2396 | >1000 | Yes/Yes |

+ amount of IL13Rα2 expression in western blot

**Supplementary Methods**

**Supplementary Methods 1: Cell Culture**

- SF-8628 (both unmodified and firefly luciferase plus red fluorescent protein [RFP] transduced) and HEK-297/17 was grown in Dulbecco’s Modified Eagle Medium (DMEM) (Cat #11995065; Thermo Fisher Scientific, Waltham, MA, USA) supplemented with 10% fetal bovine serum (FBS) (Cat #26140079; Thermo Fisher Scientific) and 1% penicillin/streptomycin (P/S) (Cat #15140122, Thermo Fisher Scientific).
- VU-DIPG-A, SU-DIPG-IV (DIPG-4), SU-DIPG-VI (DIPG-6), SU-DIPG-XIII (DIPG-13), SU-DIPG-XVII (DIPG-17), and SU-DIPG-XIV (DIPG-24) were grown in complete tumor stem medium.
- SJ-GBM2 was grown in Iscove’s Modified Dulbecco’s Medium (IMDM) (Cat #12440061; Thermo Fisher Scientific) supplemented with 10% FBS, 1% P/S, 4mM L-glutamine (L-Glut) (Cat #25030081; Thermo Fisher Scientific), and 1x insulin-transferrin-selenium (ITS) (Cat #41400045; Thermo Fisher Scientific).
- Previously mentioned cell lines were obtained by Material transfer agreement (MTA) and were obtained by Institutional Review Board (IRB) approved protocols.
- RH-30 was obtained from ATCC and was grown in Roswell Park Memorial Institute 1640 Medium (RPMI 1640) (Cat #11875093; Thermo Fisher Scientific) supplemented with 10% FBS, 1% P/S.
- BJ5TA was obtained from ATCC and was grown in DMEM with 10% FBS and 1% P/S.

All cell cultures were maintained in Nunc EasyFlask T75 vented flasks (Cat #156499; Thermo Fisher Scientific) in incubators with 5% CO2 at 37 °C.

Complete tumor stem media recipe: Complete TSM is based on a previously published medium recipe for generation of patient-derived DIPG cell cultures. Basal TSM consists of 250 mL Neurobasal-A (NBA) (Cat #10888022; Thermo Fisher Scientific), 250 mL Dulbecco’s Modified Eagle Medium/Nutrient Mixture F12 (DMEM/F12) (Cat #11330032; Thermo Fisher Scientific), 1x antibiotic-antimycotic (Cat #15240096; Thermo Fisher Scientific), 2 mM GlutaMAX (Cat #35050061; Thermo Fisher Scientific), 10 mM HEPES (Cat #15630080; Thermo Fisher Scientific), 1 mM sodium pyruvate (Cat #11360070; Thermo Fisher Scientific), and 1x MEM non-essential amino acids (Cat #11140050; Thermo Fisher Scientific).

To create complete TSM media, basal TSM media was supplemented with 1x B-27 (Cat #12587010; Thermo Fisher Scientific), 2 µg/mL heparin (Cat #07980; StemCell Technologies, Vancouver, CA), 20 ng/mL recombinant human epidermal growth factor (EGF) (Cat #100-26; Shenandoah Biotechnology, Warwick, PA, USA), 20 ng/mL recombinant human basic fibroblast growth factor (FGF-basic) (Cat #100-26; Shenandoah Biotechnology), 10 ng/mL recombinant human platelet-derived growth factor glycoprotein A (PDGF-AA) (Cat #100-16; Shenandoah Biotechnology), and 10 ng/mL recombinant human platelet-derived growth factor glycoprotein B (PDGF-BB) (Cat #100-18; Shenandoah Biotechnology).

Neurosphere-type DIPG cell passaging: Neurosphere-type DIPG cells were passaged by collecting suspended neurospheres, aspirating culture media, adding 12 mL TrypLE express (1x), no phenol (Cat #12604-039; Invitrogen) with 120 µL of 4.44 mg/mL 200× Deoxyribonuclease I in PBS (Cat #LS002007; Worthington Biochemical, Freehold, NJ, USA) in 37℃ water bath and rotating for 10 mins, with 22 mL HBSS (Cat #MT21022CV; Thermo Fisher Scientific) used to stop the TrypLE digestion. The cell mixture was filtered through a 40 µm membrane to produce a single cell suspension.

**Supplementary Methods 2: Adherent DIPG and Neurosphere-type DIPG cell Luciferase/RFP lentiviral transduction**

SF-8628 was genetically modified to stably express luciferase and red fluorescent protein (RFP) using MOI=0.7 suCMV-RFP-Luciferase Fusion (Puro) lentivirus (Cat # LVP674; GenTarget Inc, San Diego, CA, USA) and 8 μg/mL polybrene (Cat #TR-1003-G; EMD Millipore, Bulington, MA, USA). Transfected cells underwent puromycin selection (1 µg/mL) in growth media for 7 days subsequently underwent FACS selection to isolate a purified luciferase/RFP positive cell population.

SU-DIPG-IV and SU-DIPG-XVII were transduced to express firefly luciferase and RFP. Neurosphere type SU-DIPG-IV and SU-DIPG-XVII cells in single cell suspension were plated in 6-well plates and centrifuged for 90 mins at 271 RCF (Temp = 32°C, accel: 9mins, brake: 5mins) with MOI=0.7 suCMV-RFP-Luciferase Fusion (Puro) lentivirus (Cat # LVP674; GenTarget Inc, San Diego, CA, USA) and 8 μg/mL polybrene (Cat #TR-1003-G; EMD Millipore, Bulington, MA, USA) to generate stable luciferase/RFP expressing cells. Transfected cells underwent puromycin selection (1 µg/ mL) in growth media for 7 days subsequently underwent FACS selection to isolate a purified luciferase/RFP positive cell population. Transduced cells were grown in complete tumor stem medium (TSM).

**Supplementary Methods 3: Inducible shRNA lentiviral transduction**

The SF-8628 IL13Rα2 inducible knockdown cell line was developed using MOI = 0.7 IL13Rα2 PGK-dox-inducible-TurboGFP lentivirus with 8 µg/mL polybrene to promote lentivirus uptake and underwent puromycin selection (1 µg/mL). Doxycycline-inducible human *IL13Rα2* and scramble Lentiviral shRNA-TurboGFP-PGK-glycerol set-Component were purchased from GE Healthcare Dharmacon (Lafayette, CO, USA) with the following target sequences: *IL13Rα2* shRNA (ACAACAAATGAAACCCGAC) and scramble shRNA (CACACAACATGTAAACCAGGGA).

**Supplementary Methods 4: In vitro cytotoxic payload cell viability studies**

Cells in single-cell suspension were plated in a white walled, opaque bottom 96-well plate (Cat #136101, Thermo Fisher Scientific) at 100 µL/well (3 day viability testing) or 150 µL/well (6 day viability testing) complete medium at specific cell populations in triplicate: SF-8628, SJ-GBM-2, RH-30 and HEK-297/17 at 750 cells/well, VU-DIPG-A, SU-DIPG-IV, SU-DIPG-VI, SU-DIPG-XVII and SU-DIPG-24 at 1500 cells/well. Plates were cultured overnight, then exposed to monotherapy cytotoxic payloads in triplicate at specified concentrations.

Cells were incubated at 37°C with 5% CO2 until the 3-day or 6-day endpoint, then assayed with CellTiterGlo Luminescent Cell Viability Assay per the manufacturer’s protocol (Cat #G9231; Promega, Madison, WI, USA). Luminescence was measured using a BioTek Synergy HT plate reader (Agilent, Santa Clara, CA, USA). Cell viability was plotted and IC50 values were calculated using Prism (GraphPad Software, Boston, MA, USA). Each cell viability experiment was performed in triplicate.

Cytotoxic payload dosages: Thapsigargin 3 days 1-10000 nM and 6 days 1-10000 nM; cobra venom 3 days 10-10000 nM and 6 days 10-10000 nM; camptothecin 3 days 1-10000 nM and 6 days 0.1-10000 nM; SN-38 3 days 0.13-10000 nM and 6 days 0.13-10000 nM; exatecan 3 days 0.13-10000 nM and 6 days 0.13-10000 nM; MMAE 3 days 1-10000 nM and 6 days 0.13-10000 nM; MMAF 3 days 1-10000 nM and 6 days 1-10000 nM; DM-1 3 days 1-10000 nM and 6 days 1-10000 nM; PBD monoamide 3 days 0.13-10000 nM and 6 days 0.13-10000 nM; PBD dimer 3 days 0.0013-100 nM and 6 days 0.0001-10 nM.

**Supplementary Methods 5: Immunoblotting (for detection of whole-cell IL13Rα2 protein)**

De-identified patient primary tissues were obtained from the cc-TDI institutional biobank with IRB approval. Samples were rinsed with cold PBS and subsequently cut into small pieces using a disposable #10 scalpel. Radioimmunoprecipitation assay (RIPA) buffer (550 µL/100 mg of tissue) (Cat #89901; Thermo Fisher Scientific) and 1x proteinase inhibitor cocktail (Cat #78440; Thermo Fisher Scientific) were used to lyse tissue pieces for 30 mins which were then sonicated (2-5 minutes in 10 second burst cycles of 120 watts, 50% amplitude), all on ice. Sonicated tissue was centrifuged at 12,000 RPM for 30 minutes at 4°C and transferred to a new tube. Cells were lysed with RIPA and 1x proteinase inhibitor cocktail. Protein concentration was quantified through BCA assay. Lysates were boiled in Laemmli Buffer at 95°C for 5 minutes. Thirty µg of protein lysates was loaded into a 4–20% precast polyacrylamide gel (Cat #456-1094; Bio-Rad Laboratories, Hercules, CA, USA), transferred to PVDF membrane, washed in TBST buffer, blocked in 5% fat-free milk for 30 minutes at room temperature, then incubated with primary antibodies diluted in blocking buffer (Cat #37580; Thermo Fisher Scientific) at 4°C overnight. Signal was detected with species-appropriate horseradish peroxidase (HRP)-conjugated secondary antibody using Clarity Western blot ECL Substrate (Cat #1705061; Bio-Rad) and imaged using an IVIS Lumina II imaging system (Caliper Life Sciences, Hopkinton, MA, USA).

The following primary-secondary antibodies were used in the study: anti-IL13Rα2 E7U7B clone primary (Cat #85677S; Cell Signaling Technology, Danvers, MA, USA) with HRP goat anti-rabbit IgG secondary antibody (Cat #PI-1000; Vector Laboratories, Burlingame, CA, USA), anti-IL13Rα2 2E10 clone primary (Cat #WH0003598M1; Sigma-Aldrich, St. Louis, MO, USA) with horse anti-goat IgG secondary antibody (Cat #PI-9500; Vector Laboratories, Burlingame, CA, USA), anti-IL13Rα2 47 clone primary (Cat #360303; Biolegend, San Diego, CA, USA) with HRP horse anti-mouse IgG secondary antibody (Cat #PI-1000; Vector Laboratories), anti-GAPDH 14C10 clone primary antibody (Cat #2188; Cell Signaling Technology) with HRP goat anti-rabbit IgG secondary antibody (Cat #PI-1000; Vector Laboratories), (1:500 2E10, 1:500 47, 1:1000 E7U7B. 1:2000 14C10).

**Supplementary Methods 6: Jess Simple Western Immunoblotting (for detection of subcellular IL13Rα2 protein)**

Cultured human glioblastoma, DIPG and normal fibroblast cell lines were harvested using trypsin-EDTA (at least 5x106 cells per line). Membrane and cytoplasmic proteins were then isolated using a subcellular fractionation kit (ThermoFisher, Cat #78840) according to the manufacturer’s instructions.

IL13Rα2 protein expression was detected using the Jess™ Simple Western automated capillary-based immunoblotting system (ProteinSimple™, Bio-Techne, Minneapolis, MN, USA). Briefly, total protein content for each sample was determined by BCA assay. Samples were diluted to a final concentration of 1.7–2 µg/µL in sample buffer and denatured at 95 °C for 5 minutes. Samples and reagents, including primary antibodies, secondary antibody and chemiluminescence reagents, were prepared and loaded into the capillary cartridge according to the manufacturer’s instructions (https://www.bio-techne.com/pdf-download-arena-document/product-insert/pl3-0005). The default 12-230 kDa chemiluminescence protocol settings were used for the Jess run. Data acquisition and analysis were performed using Compass software.

The following antibodies were used in this study: Primary antibodies against IL13Rα2 (rabbit, 1:50 dilution, Cell Signaling, Cat #85677S), GAPDH (rabbit, 1:15000 dilution, Cell Signaling, Cat #2118). Anti-rabbit secondary antibody (ProteinSimple, Cat #042-206).

**Supplementary Methods 7: FACS binding protocols for conjugated and unconjugated antibodies**

Fluorescein conjugated anti-human IL13Rα2 mAb: Negative control groups did not receive any reagent at this step. Isotype control groups were added by 10 μL fluorescein conjugated isotype control antibody per 106 cells. Treatment groups were added by 10 μL fluorescein conjugated anti-human IL13Rα2 mAb per 106 cells. Cells were gently vortexed and incubated for 2h on ice, protected from light.

**Supplementary Methods 8: Additional details for Computational analysis of avidity and residue binding**

The modeling process reduced the number of binding poses generated by Zdock from 2000 to 765 and 1769 for 2E10 and clone 47 respectively, under the condition that Tyr103 of antibody Fab is close to IL13Rα2 within 6 angstroms. Molecular mechanics calculations were performed for the poses and binding scores between the antibody Fab and IL13Rα2 were obtained. The top 20 poses in score ranking were extracted, the binding structure was visually examined, and the best binding structure was proposed.

**Supplementary Methods 9: Additional methods for construction of chimeric antibody**

First, the antibody inter-chain disulfide bonds were reduced with TCEP and then the maleimide moiety of deruxtecan was linked to the reduced cysteines to generate the ADC. The antibody and ADC’s concentration, weight, and molarity were 9.44 µg/µL, 145000 mol/g, 0.06511 nmol/µL and 8.4 µg/µL, 159129.06 mol/g, 0.05283 nmol/µL, respectively. The resulting drug-antibody ratio in the ADC was 7.99. The final ADC had endotoxin < 0.011EU/mg and free drug < 0.079% mol/mol. Chimeric antibody binding was confirmed using His tagged rhIL13Rα2 from ACROBiosystems (Cat# NBP2-23147, Novus Biologicals, Newark, DE, USA). Note, both rhIL13Rα2 products have identical amino acid sequences (amino acids 27-343). The resulting ADC (human chimeric anti-IL13Rα2::deruxtecan ADC, designated h-2E10-DXd) was used for further in vitroand in vivostudies.

Unconjugated anti-human IL-13Rα2 mAb: Negative control groups did not receive any reagent at this step. Isotype control groups were added by 10 µL unconjugated isotype control antibody per 106 cells. Treatment groups were added by 10 µL unconjugated anti-human IL-13Rα2 mAb per 106 cells. Cells were gently vortexed and incubated for 2h, protected from light on ice. Next, cells were then washed using 1 mL Flow Cytometry Staining Buffer and centrifuged at 200g at 4℃ for 5 mins to pellet cells. After washing cells to remove the primary antibody, the cell pellet was resuspended in 100 μL staining buffer. Next 1 μg rat anti-mouse IgG1 secondary antibody, APC (Cat# 17-4015-82, Thermo Fisher Scientific) or rat anti-mouse IgG2a secondary antibody PE (Cat# 17-4210-82, Thermo Fisher Scientific) was added followed by incubation for 30 mins, protected from light. Unbound conjugated antibody was removed by washing cells with 1 ml Flow Cytometry Staining Buffer 2 times. Cells were centrifuged at 200 g for 5 mins, decanting the supernatant. Cells were resuspended in 200 µL of Flow Cytometry Staining Buffer for final flow cytometric analysis. Flow cytometry sorting was performed by BD FACSAria II system (BD Biosciences, Franklin Lakes, NJ, USA).

The following antibodies were used in the study: anti-IL13Rα2 2E10 clone unconjugated antibody (Cat# WH0003598M1; Sigma-Aldrich), anti-IL13Rα2 clone 47 unconjugated antibody (Cat# 360303; Biolegend), anti-IL13Rα2 clone 47 conjugated PE antibody (Cat# 360306; Biolegend) and anti-IL13Rα2 E7U7B clone conjugated Alexa Fluor® 647 antibody (Cat# 34969, Cell Signaling Technology).

**Supplementary Methods 10: *Ex ovo* anti-tumor efficacy studies using the human-mouse chimeric anti-IL13Rα2::deruxtecan ADC**

The chorioallantoic membrane (CAM) assay was conducted on embryonic quail (Pacific Coast Farms, Oregon, USA) cultured in six well plates (Cat # CC Plate–PS-6A-F-C-S; Advangene, Lake Bluff, IL, USA). The quail were prepared by incubating them in ovo for 72 hours, sanitizing the outside with an 70% ethanol spray, transferring the egg contents to a six well dish via quail egg cracking device1, and finally incubating for a further 96 hours at 37 °C and 100% humidity. The RFP+ Luciferase+ transformed cell lines SF-8628, DIPG-4, and DIPG-24 were cultured in growth media, resuspended into a single cell suspension, and counted using a Countess II automated cell counter (AMQAX1000; Thermo Fisher Scientific, Inc., Waltham, MA, USA). The cells were then centrifuged and resuspended in Hydrogel-C (Cat #GS313; ESI-BIO, Alameda, CA, USA) at a concentration of 50,000 cells per 25 μL for SF-8628 and 25,000 cells per 25 μL for DIPG-4 and DIPG-24. Cells in hydrogel were divided into four cohorts treated with either vehicle control, h-2E10 antibody at 20 nM, DXd at 160 nM or ADC at 20 nM, and 25 μL of treated cells were placed into 6 mm diameter circles of Lena bioscience 3D scaffolding (Cat #SC-S510-0001; LenaBioscience, Atlanta, GA, USA), now referred to as tumor modules, and incubated for 30 minutes at 37C and 5% CO2.

P-10 beads (Cat#1504140, Hercules, California, USA) were soaked in PBS and either vehicle control, 20 nM h-2E10 antibody, 160 nM DXd, or 20 nM ADC and incubated at room temperature for 4 hours. The tumor modules were placed onto the CAM at the site of a small abrasion with 1-2 tumor modules placed on each quail CAM. A sterilized silicone ring was placed around the tumor modules and p-10 beads soaked in the compound of the module’s cohort was placed on top, filling the ring and becoming a drug depot that maintains the concentration of therapeutic compound for the duration of the experiment.

The engrafted quail were incubated for 144 hours at 37 °C and then imaged using an IVIS 3D system (Perkin-Elmer, Waltham, MA). During imaging the rings and p-10 beads are removed, and 100 μL of 1.5 mg/mL luciferin (Cat #122799; PerkinElmer, Waltham, MA, USA) was added topically to each tumor module. The six well dish was protected from light and incubated at 37 °C for 5 mins before imaging on the IVIS with 10 seconds exposure for SF-8628 and DIPG-4, and 30 seconds exposure for DIPG-24.

References :

**1.** Rasmussen SV, Berlow NE, Price LH, et al. Preclinical therapeutics ex ovo quail eggs as a biomimetic automation-ready xenograft platform. *Sci Rep.* 2021; 11(1):23302.
